# Supplementary material for: Quality of Life after Late Invasive Therapy for Occluded Arteries
Source: Atypon-hosted journal article supplement (doi:10.1056/nejmoa0805151), 2009-02-18
Supplement: nejm_mark_774sa1.pdf [file nejm_mark_774sa1.pdf]

## Supplementary Appendix

This appendix has been provided by the authors to give readers additional information about their work.

Supplement to: Mark DB, Pan W, Clapp-Channing NE, et al. Quality of life after late invasive therapy for occluded arteries. *N Engl J Med* 2009;360:774-83.

**Appendix Table: Additional Secondary QOL Measures by Intention to Treat**

|                                     |        | <u>PCI</u>    | <u>MED</u>    | <u>Difference between<br/>PCI and MED<br/>(95% CI)</u> |
|-------------------------------------|--------|---------------|---------------|--------------------------------------------------------|
| <b>SF role function - emotional</b> |        |               |               |                                                        |
| Baseline                            | N      | 432           | 432           |                                                        |
|                                     | median | 100 (67, 100) | 100 (33, 100) |                                                        |
|                                     | mean   | 76.62±37.94   | 71.76±40.55   | 4.86 (-0.4, 10.1)                                      |
| 4 months                            | N      | 409           | 411           |                                                        |
|                                     | median | 100 (33, 100) | 100 (67, 100) |                                                        |
|                                     | mean   | 75.26±37.74   | 76.16±37.65   | -0.89 (-6.1, 4.3)                                      |
| 12 months                           | N      | 399           | 396           |                                                        |
|                                     | median | 100 (67,100)  | 100 (67,100)  |                                                        |
|                                     | mean   | 78.99±36.29   | 79.12±36.00   | -0.14 (-5.2, 4.9)                                      |
| 24 months                           | N      | 379           | 375           |                                                        |
|                                     | median | 100 (67,100)  | 100 (67,100)  |                                                        |
|                                     | mean   | 82.41±33.35   | 79.69±36.48   | 2.72 (-2.3, 7.7)                                       |
| <b>SF role function - physical</b>  |        |               |               |                                                        |
| Baseline                            | N      | 429           | 427           |                                                        |
|                                     | median | 50 (0,100)    | 75 (0,100)    |                                                        |
|                                     | mean   | 54.74±43.08   | 56.03±44.21   | -1.29 (-7.2, 4.6)                                      |
| 4 months                            | N      | 407           | 408           |                                                        |
|                                     | median | 75 (0,100)    | 75 (25,100)   |                                                        |
|                                     | mean   | 58.85±42.28   | 59.38±40.94   | -0.53 (-6.3, 5.2)                                      |
| 12 months                           | N      | 400           | 396           |                                                        |
|                                     | median | 100 (25,100)  | 100 (25,100)  |                                                        |
|                                     | mean   | 68.90±39.04   | 69.34±40.73   | -0.44 (-6.0, 5.1)                                      |
| 24 months                           | N      | 380           | 381           |                                                        |
|                                     | median | 100 (25,100)  | 100 (50,100)  |                                                        |
|                                     | mean   | 68.82±40.09   | 70.19±38.58   | -1.37 (-7.0, 4.2)                                      |
| <b>SF general health</b>            |        |               |               |                                                        |
| Baseline                            | N      | 443           | 443           |                                                        |
|                                     | median | 57 (50,62)    | 57 (50,65)    |                                                        |
|                                     | mean   | 56.25±11.06   | 56.86±11.25   | -0.62 (-2.1, 0.9)                                      |
| 4 months                            | N      | 410           | 416           |                                                        |
|                                     | median | 57 (50,62)    | 57 (50,62)    |                                                        |
|                                     | mean   | 55.49±9.67    | 55.41±10.51   | 0.08 (-1.3, 1.5)                                       |
| 12 months                           | N      | 409           | 404           |                                                        |

Quality of Life and Economic Outcomes for Percutaneous Coronary Intervention versus Medical Therapy Alone in Patients with Occluded Infarct Arteries  
Mark DB, et al.

|                              |        |              |              |                   |
|------------------------------|--------|--------------|--------------|-------------------|
|                              | median | 57 (47,62)   | 57 (50,62)   |                   |
|                              | mean   | 54.75±10.26  | 55.52±9.49   | -0.77 (-2.1, 0.6) |
| 24 months                    | N      | 383          | 384          |                   |
|                              | median | 57 (50,62)   | 57 (50,62)   |                   |
|                              | mean   | 54.86±9.54   | 55.60±10.17  | -0.74 (-2.1, 0.7) |
| <b>SF vitality</b>           |        |              |              |                   |
| Baseline                     | N      | 442          | 446          |                   |
|                              | median | 60 (40,75)   | 58 (40,75)   |                   |
|                              | mean   | 56.83±23.66  | 55.92±24.09  | 0.92 (-2.2, 4.1)  |
| 4 months                     | N      | 414          | 420          |                   |
|                              | median | 60 (45,80)   | 60 (45,80)   |                   |
|                              | mean   | 59.45±23.38  | 58.19±23.23  | 1.27 (-1.9, 4.4)  |
| 12 months                    | N      | 408          | 406          |                   |
|                              | median | 60 (45,80)   | 65 (45,80)   |                   |
|                              | mean   | 59.73±21.37  | 60.30±23.05  | -0.57 (-3.6, 2.5) |
| 24 months                    | N      | 386          | 387          |                   |
|                              | median | 63 (50,80)   | 65 (45,80)   |                   |
|                              | mean   | 60.79±21.65  | 60.10±22.86  | 0.70 (-2.5, 3.8)  |
| <b>SF social functioning</b> |        |              |              |                   |
| Baseline                     | N      | 446          | 450          |                   |
|                              | median | 81 (50,100)  | 88 (50,100)  |                   |
|                              | mean   | 74.13±27.37  | 74.25±28.40  | -0.12 (-3.8, 3.5) |
| 4 months                     | N      | 416          | 420          |                   |
|                              | median | 94 (63,100)  | 88 (63,100)  |                   |
|                              | mean   | 81.07±24.31  | 79.85±25.35  | 1.22 (-2.2, 4.6)  |
| 12 months                    | N      | 410          | 406          |                   |
|                              | median | 100 (75,100) | 100 (75,100) |                   |
|                              | mean   | 84.60±21.28  | 83.53±23.39  | 1.08 (-2.0, 4.2)  |
| 24 months                    | N      | 388          | 389          |                   |
|                              | median | 100 (75,100) | 100 (75,100) |                   |
|                              | mean   | 84.66±21.68  | 83.23±22.82  | 1.44 (-1.7, 4.6)  |
| <b>SF pain index</b>         |        |              |              |                   |
| Baseline                     | N      | 447          | 449          |                   |
|                              | median | 62 (41,84)   | 62 (41,84)   |                   |
|                              | mean   | 61.74±26.85  | 60.55±28.30  | 1.19 (-2.4, 4.8)  |
| 4 months                     | N      | 414          | 420          |                   |
|                              | median | 74 (61,100)  | 74 (61,100)  |                   |
|                              | mean   | 73.58±24.60  | 73.88±24.36  | -0.29 (-3.6, 3.0) |
| 12 months                    | N      | 409          | 406          |                   |
|                              | median | 74 (52,100)  | 74 (61,100)  |                   |
|                              | mean   | 73.59±24.39  | 74.04±24.85  | -0.46 (-3.8, 2.9) |
| 24 months                    | N      | 388          | 390          |                   |
|                              | median | 74 (52,100)  | 74 (61,100)  |                   |

|                           |        |               |               |                           |
|---------------------------|--------|---------------|---------------|---------------------------|
|                           | mean   | 72.72±24.94   | 74.59±24.94   | -1.87 (-5.4, 1.6)         |
| <b>Bed days</b>           |        |               |               |                           |
| Baseline                  | N      | 422           | 428           |                           |
|                           | mean   | 1.45±4.26     | 1.76±5.17     | -0.31 (-1.0, 0.3)         |
| 4 months                  | N      | 397           | 402           |                           |
|                           | mean   | 0.83±3.24     | 0.95±3.60     | -0.12 (-0.6, 0.4)         |
| 12 months                 | N      | 387           | 391           |                           |
|                           | mean   | 0.78±3.59     | 0.92±4.21     | -0.14 (-0.7, 0.4)         |
| 24 months                 | N      | 365           | 368           |                           |
|                           | mean   | 0.98±4.24     | 0.76±3.51     | 0.22 (-0.3, 0.8)          |
| <b>Disability days</b>    |        |               |               |                           |
| Baseline                  | N      | 422           | 424           |                           |
|                           | mean   | 5.59±10.28    | 5.62±10.46    | 0.26 (-1.4, 1.4)          |
| 4 months                  | N      | 394           | 394           |                           |
|                           | mean   | 5.07±11.03    | 4.81±10.99    | -0.27 (-1.3, 1.8)         |
| 12 months                 | N      | 383           | 388           |                           |
|                           | mean   | 2.68±7.50     | 2.95±8.35     | -1.27 (-1.4, 0.9)         |
| 24 months                 | N      | 363           | 360           |                           |
|                           | mean   | 2.18±6.48     | 3.45±9.67     | -0.93 (-2.5, 0.1)         |
| <b>0-100 rating scale</b> |        |               |               |                           |
| Baseline                  | N      | 435           | 439           |                           |
|                           | median | 80 (60,90)    | 76 (60,90)    |                           |
|                           | mean   | 73.85±20.40   | 72.83±20.96   | 0.91 (-1.7, 3.8)          |
| 4 months                  | N      | 405           | 406           |                           |
|                           | median | 80 (70,90)    | 80 (67,90)    |                           |
|                           | mean   | 76.97±17.57   | 76.06±19.83   | 0.14 (-1.7, 3.5)          |
| 12 months                 | N      | 399           | 402           |                           |
|                           | median | 80 (70,90)    | 80 (70,90)    |                           |
|                           | mean   | 78.08±17.35   | 77.94±18.23   | 0.46 (-2.3, 2.6)          |
| 24 months                 | N      | 373           | 380           |                           |
|                           | median | 80 (70,90)    | 80 (70,90)    |                           |
|                           | mean   | 77.99±17.51   | 77.53±18.57   | 1.19 (-2.1, 3.1)          |
| <b>Time Trade-Off</b>     |        |               |               |                           |
| Baseline                  | N      | 413           | 410           |                           |
|                           | median | 0.9 (0.6,1.0) | 1.0 (0.7,1.0) |                           |
|                           | mean   | 0.72±0.37     | 0.75±0.36     | <b>-0.03 (-0.08,0.02)</b> |
| 4 months                  | N      | 378           | 385           |                           |
|                           | median | 1.0 (0.9,1.0) | 1.0 (0.8,1.0) |                           |
|                           | mean   | 0.85±0.28     | 0.79±0.33     | <b>0.06 (0.01,0.10)</b>   |
| 12 months                 | N      | 378           | 368           |                           |
|                           | median | 1.0 (0.9,1.0) | 1.0 (0.9,1.0) |                           |
|                           | mean   | 0.85±0.30     | 0.84±0.30     | 0.00 (-0.04,0.05)         |

Quality of Life and Economic Outcomes for Percutaneous Coronary Intervention versus Medical Therapy Alone in Patients with Occluded Infarct Arteries  
Mark DB, et al.

|                                  |        |               |               |                     |
|----------------------------------|--------|---------------|---------------|---------------------|
| 24 months                        | N      | 361           | 359           |                     |
|                                  | median | 1.0 (0.9,1.0) | 1.0 (0.9,1.0) |                     |
|                                  | mean   | 0.87±0.27     | 0.84±0.31     | 0.03 (-0.01,0.08)   |
| <b>Working full or part time</b> |        |               |               |                     |
| Baseline                         | N      | 447           | 442           |                     |
|                                  | % yes  | 50.3          | 51.6          | -1.25 (-7.82,5.32)  |
| 4 months                         | N      | 418           | 424           |                     |
|                                  | % yes  | 43.8          | 45.8          | -1.97 (-8.69,4.74)  |
| 12 months                        | N      | 407           | 411           |                     |
|                                  | % yes  | 44.0          | 46.7          | -2.73 (-9.56,4.09)  |
| 24 months                        | N      | 389           | 386           |                     |
|                                  | % yes  | 41.9          | 46.6          | -4.73 (-11.72,2.26) |

Continuous variables shown as medians (25<sup>th</sup> to 75<sup>th</sup> percentiles) and means with standard deviations. Categorical variables are shown as percentages.

95% confidence intervals on treatment differences calculated as PCI minus MED.  
Comparisons with bolded values were statistically significant at a  $p \leq 0.05$  level.
